# Supplementary material for: Electronic effects in early transition metal catalyzed olefin polymerization: challenges in featurization and descriptor strengths and weaknesses
Source: Royal Society of Chemistry journal article supplement (doi:10.1039/d5dt02170g), 2025-01-01
Supplement: d5dt02170g8.xlsx [file d5dt02170g8.xlsx]

## Sheet: MClx
	IBO-WBI		NBO-WBI		IBO-BC
	M-Cl(1)	M-Cl(2)	M-Cl(1)	M-Cl(2)	M-Cl(1)	M-Cl(2)
Phosphinimide_ScCl	0.71028	N/A	0.712	N/A	1.744	N/A
Phosphinimide_YCl	0.464	N/A	0.6511	N/A	1.852	N/A
Phosphinimide_TiCl2	0.75039	0.74793	0.8923	0.887	1.682	1.682
Phosphinimide_ZrCl2	0.37766	0.37774	0.8492	0.8471	1.847	1.848
Phosphinimide_HfCl2	0.39085	0.39095	0.8451	0.8424	1.838	1.838
Kol-Type_Salan_ScCl	0.68712	N/A	0.6794	N/A	1.743	N/A
Kol-Type_Salan_YCl	0.43486	N/A	0.629	N/A	1.853	N/A
Kol-Type_Salan_TiCl2	0.82318	0.82318	0.9755	0.9755	1.675	1.675
Kol-Type_Salan_ZrCl2	0.35757	0.35757	0.8736	0.8736	1.857	1.857
Kol-Type_Salan_HfCl2	0.36826	0.36826	0.8557	0.8557	1.848	1.848
Metallocene_ScCl	0.75597	N/A	0.8092	N/A	1.719	N/A
Metallocene_YCl	0.47342	N/A	0.7796	N/A	1.848	N/A
Metallocene_TiCl2	0.80476	0.80476	0.9555	0.9555	1.644	1.644
Metallocene_ZrCl2	0.3794	0.3794	0.9305	0.9305	1.843	1.843
Metallocene_HfCl2	0.39554	0.39554	0.9054	0.9054	1.832	1.832
	IBO-charges				QTAIM-charges				NPA-charges				ESP-charges				Mulliken-charges				Hirshfeld-charges				CM5-charges
	M	Cl(1)	Cl(2)	Total	M	Cl(1)	Cl(2)	Total	M	Cl(1)	Cl(2)	Total	M	Cl(1)	Cl(2)	Total	M	Cl(1)	Cl(2)	Total	M	Cl(1)	Cl(2)	Total	M	Cl(1)	Cl(2)	Total
Phosphinimide_ScCl	1.20656	-0.55966	N/A	-0.00017	1.80312	-0.60421	N/A	-0.00012	1.66019	-0.58294	N/A	0	0.924291	-0.540171	N/A	0	0.595439	-0.375672	N/A	0	0.507435	-0.352855	N/A	2.7e-05	1.03717	-0.428091	N/A	2.7e-05
Phosphinimide_YCl	2.25757	-0.73834	N/A	-5e-05	2.0782	-0.66601	N/A	1e-05	1.87992	-0.62882	N/A	0	1.23084	-0.587823	N/A	0	0.717519	-0.425723	N/A	0	0.623191	-0.37555	N/A	1e-05	1.1479	-0.453206	N/A	1e-05
Phosphinimide_TiCl2	1.20575	-0.49279	-0.49395	0.00033	1.82403	-0.49733	-0.49856	0.00016	1.24959	-0.41699	-0.42005	0	0.620654	-0.351854	-0.354189	0	0.447876	-0.314631	-0.30821	0	0.386575	-0.273635	-0.273044	-0.00018	0.982807	-0.343403	-0.342739	-0.00018
Phosphinimide_ZrCl2	3.14102	-0.7746	-0.77442	5e-05	2.2586	-0.56653	-0.56623	0.00033	1.61993	-0.46329	-0.46485	0	0.74733	-0.40162	-0.398427	0	0.633648	-0.345914	-0.343698	0	0.497144	-0.281737	-0.281362	-0.000167	1.10267	-0.3568	-0.356499	-0.000167
Phosphinimide_HfCl2	3.09409	-0.76473	-0.76497	0.00017	2.38867	-0.58081	-0.58092	7e-05	1.78564	-0.47486	-0.47673	0	0.6733	-0.375673	-0.372475	0	0.467895	-0.29078	-0.28378	0	0.49777	-0.270291	-0.269955	-0.000161	1.12979	-0.349891	-0.349625	-0.000161
Kol-Type_Salan_ScCl	1.28412	-0.56018	N/A	-0.00034	1.92552	-0.56713	N/A	-0.00035	1.79167	-0.59732	N/A	0	1.18074	-0.513509	N/A	0	0.882175	-0.382404	N/A	0	0.53101	-0.329305	N/A	-9.3e-05	1.15168	-0.403669	N/A	-9.3e-05
Kol-Type_Salan_YCl	2.17072	-0.73643	N/A	-0.00012	2.2135	-0.63169	N/A	-5e-05	1.96536	-0.63508	N/A	0	1.48233	-0.568707	N/A	0	1.02963	-0.427759	N/A	0	0.633158	-0.354867	N/A	-3.9e-05	1.26815	-0.431966	N/A	-3.9e-05
Kol-Type_Salan_TiCl2	1.36322	-0.44394	-0.44394	0.00028	2.0239	-0.42563	-0.42557	0.00027	1.51257	-0.37495	-0.37495	0	0.740362	-0.310752	-0.31113	0	0.839769	-0.292527	-0.292527	0	0.479682	-0.233421	-0.233421	9e-05	1.11338	-0.305762	-0.305762	9e-05
Kol-Type_Salan_ZrCl2	3.08263	-0.77995	-0.77995	-0.00045	2.47633	-0.52548	-0.5255	-0.00041	1.89985	-0.45752	-0.45752	0	1.12353	-0.368057	-0.368748	0	1.13142	-0.345305	-0.345305	0	0.601411	-0.255942	-0.255942	7e-05	1.26635	-0.332474	-0.332474	7e-05
Kol-Type_Salan_HfCl2	3.03665	-0.77096	-0.77096	0.00046	2.59066	-0.53697	-0.53698	0.00048	2.04015	-0.47649	-0.47649	0	1.05387	-0.348106	-0.348517	0	1.04911	-0.292911	-0.292911	0	0.595142	-0.251683	-0.251683	9e-05	1.2943	-0.331629	-0.331629	9e-05
Metallocene_ScCl	1.21266	-0.52513	N/A	0.00034	1.82235	-0.56731	N/A	0.00067	1.63703	-0.52339	N/A	0	0.955288	-0.538857	N/A	0	0.734816	-0.335609	N/A	0	0.452237	-0.343023	N/A	-0.00031	0.879663	-0.419194	N/A	-0.00031
Metallocene_YCl	2.23894	-0.73288	N/A	0.0001	2.07425	-0.62672	N/A	0.00015	1.78263	-0.55007	N/A	0	1.09705	-0.559304	N/A	0	0.850094	-0.393178	N/A	0	0.551006	-0.364208	N/A	-0.000138	1.00019	-0.444498	N/A	-0.000138
Metallocene_TiCl2	1.19516	-0.45298	-0.45298	0.0005	1.83979	-0.44748	-0.44748	0.00091	1.37647	-0.39001	-0.39001	0	0.474174	-0.330084	-0.330257	0	0.695566	-0.257505	-0.257505	0	0.366881	-0.249669	-0.249669	-0.000183	0.776353	-0.320151	-0.320151	-0.000183
Metallocene_ZrCl2	3.14005	-0.77176	-0.77176	0.00036	2.2236	-0.51152	-0.51165	0.00047	1.5567	-0.40559	-0.40559	0	0.675017	-0.352669	-0.353129	0	0.791888	-0.293765	-0.293765	0	0.468275	-0.259191	-0.259191	0.000149	0.939847	-0.336667	-0.336667	0.000149
Metallocene_HfCl2	3.09735	-0.7609	-0.7609	-0.00028	2.39301	-0.52963	-0.52956	-0.00013	1.83727	-0.43685	-0.43685	0	0.576931	-0.317752	-0.31819	0	0.713925	-0.23042	-0.23042	0	0.494467	-0.248958	-0.248958	0.000127	0.985864	-0.330741	-0.330741	0.000127

## Sheet: MMex
	IBO-WBI		NBO-WBI		IBO-BC
	M-C(Me1)	M-C(Me2)	M-C(Me1)	M-C(Me2)	M-Me(1)	M-Me(2)
Phosphinimide_ScMe	0.65571	N/A	0.4849	N/A	1.58	N/A
Phosphinimide_YMe_SF	0.34418	N/A	0.4294	N/A	1.832	N/A
Phosphinimide_TiMe2	0.75399	0.75345	0.7189	0.7189	1.448	1.448
Phosphinimide_ZrMe2	0.31927	0.31976	0.6766	0.6768	1.818	1.818
Phosphinimide_HfMe2	0.34852	0.34898	0.6288	0.6294	1.796	1.796
Kol-Type_Salan_ScMe	0.66813	N/A	0.4824	N/A	1.575	N/A
Kol-Type_Salan_YMe	0.31574	N/A	0.4197	N/A	1.842	N/A
Kol-Type_Salan_TiMe2	0.78698	0.78698	0.7414	0.7414	1.431	1.431
Kol-Type_Salan_ZrMe2	0.27984	0.27984	0.6464	0.6464	1.848	1.848
Kol-Type_Salan_HfMe2	0.31164	0.31164	0.5859	0.5859	1.822	1.822
Metallocene_ScMe	0.70565	N/A	0.4946	N/A	1.528	N/A
Metallocene_YMe	0.33079	N/A	0.4601	N/A	1.839	N/A
Metallocene_TiMe2	0.80104	0.80095	0.7179	0.7178	1.369	1.369
Metallocene_ZrMe2	0.31674	0.31675	0.7063	0.7063	1.813	1.813
Metallocene_HfMe2	0.35299	0.353	0.6138	0.6138	1.788	1.788
	IBO-charges										QTAIM-charges										NPA-charges										ESP-charges										Mulliken-charges
	M	C(Me1)	H1(Me1)	H2(Me1)	H3(Me1)	C(Me2)	H1(Me2)	H2(Me2)	H3(Me2)	Total	M	C(Me1)	H1(Me1)	H2(Me1)	H3(Me1)	C(Me2)	H1(Me2)	H2(Me2)	H3(Me2)	Total	M	C(Me1)	H1(Me1)	H2(Me1)	H3(Me1)	C(Me2)	H1(Me2)	H2(Me2)	H3(Me2)	Total	M	C(Me1)	H1(Me1)	H2(Me1)	H3(Me1)	C(Me2)	H1(Me2)	H2(Me2)	H3(Me2)	Total	M	C(Me1)	H1(Me1)	H2(Me1)	H3(Me1)	C(Me2)	H1(Me2)	H2(Me2)	H3(Me2)
Phosphinimide_ScMe	1.26783	-0.8447	0.10526	0.10002	0.10571	N/A	N/A	N/A	N/A	0.00029	1.86295	-0.09379	-0.19445	-0.19117	-0.18664	N/A	N/A	N/A	N/A	0.00036	1.87689	-1.34642	0.22141	0.21534	0.22214	N/A	N/A	N/A	N/A	0	1.16378	-0.755766	0.080162	0.097337	0.079146	N/A	N/A	N/A	N/A	0	0.586112	-0.401048	0.048851	0.030294	0.049135	N/A	N/A	N/A	N/A
Phosphinimide_YMe_SF	2.29321	-1.09835	0.10626	0.10445	0.10649	N/A	N/A	N/A	N/A	-7e-05	2.15467	-0.1525	-0.19972	-0.19536	-0.19929	N/A	N/A	N/A	N/A	0.00013	2.04976	-1.39685	0.22258	0.22031	0.2226	N/A	N/A	N/A	N/A	0	1.41452	-0.872444	0.093653	0.13193	0.094344	N/A	N/A	N/A	N/A	0	0.672108	-0.39833	0.034353	0.022597	0.037797	N/A	N/A	N/A	N/A
Phosphinimide_TiMe2	1.2911	-0.74259	0.11134	0.1121	0.10623	-0.74172	0.11064	0.11156	0.10667	-0.00011	1.91358	-0.03388	-0.1553	-0.17186	-0.17103	-0.03166	-0.17202	-0.15277	-0.17069	-0.00035	1.65492	-1.14011	0.22121	0.22702	0.21602	-1.13977	0.2254	0.22161	0.21675	0	1.15097	-0.632325	0.09485	0.08356	0.091042	-0.6422	0.084242	0.096098	0.100655	0	0.370193	-0.300995	0.062127	0.050947	0.055688	-0.296778	0.045513	0.062651	0.056841
Phosphinimide_ZrMe2	3.17918	-1.1322	0.11263	0.1138	0.10366	-1.13046	0.11246	0.11297	0.10342	-0.00013	2.39589	-0.12589	-0.16236	-0.17171	-0.18205	-0.12405	-0.17153	-0.1618	-0.1827	3e-05	1.93149	-1.21672	0.22834	0.23312	0.22183	-1.21567	0.23161	0.22873	0.22201	0	1.13325	-0.624838	0.091068	0.08426	0.089806	-0.612723	0.079172	0.08789	0.090885	0	0.50536	-0.362241	0.063714	0.055209	0.056865	-0.355937	0.050651	0.063629	0.056797
Phosphinimide_HfMe2	3.12285	-1.11557	0.11307	0.11363	0.10605	-1.11335	0.11188	0.11357	0.10544	1e-05	2.52176	-0.14723	-0.16527	-0.17481	-0.18037	-0.14465	-0.17501	-0.16394	-0.18168	0.0002	2.15195	-1.27013	0.23053	0.23573	0.22532	-1.26859	0.23387	0.23105	0.22543	0	1.0117	-0.737773	0.126199	0.113533	0.125219	-0.55872	0.062838	0.080294	0.082321	0	0.378196	-0.289671	0.050519	0.042196	0.037703	-0.282549	0.038982	0.049237	0.037367
Kol-Type_Salan_ScMe	1.32798	-0.83607	0.10354	0.09374	0.11299	N/A	N/A	N/A	N/A	0.00018	1.9693	-0.05361	-0.19587	-0.19569	-0.18781	N/A	N/A	N/A	N/A	0.00034	1.95822	-1.351	0.21986	0.20853	0.2286	N/A	N/A	N/A	N/A	0	1.51654	-0.976496	0.127665	0.171471	0.148347	N/A	N/A	N/A	N/A	0	0.849229	-0.390708	0.047347	0.015884	0.068972	N/A	N/A	N/A	N/A
Kol-Type_Salan_YMe	2.21562	-1.10305	0.10049	0.10677	0.106	N/A	N/A	N/A	N/A	-0.00042	2.27578	-0.13199	-0.19818	-0.20283	-0.19352	N/A	N/A	N/A	N/A	9e-05	2.10677	-1.4032	0.21662	0.22544	0.22343	N/A	N/A	N/A	N/A	0	1.78547	-1.1485	0.213548	0.172584	0.161217	N/A	N/A	N/A	N/A	0	0.950789	-0.387322	0.013474	0.04675	0.042367	N/A	N/A	N/A	N/A
Kol-Type_Salan_TiMe2	1.46589	-0.75066	0.12737	0.11286	0.12105	-0.75066	0.12737	0.11286	0.12105	0.0001	2.0652	-0.03722	-0.15159	-0.15788	-0.14239	-0.03714	-0.15161	-0.15784	-0.1424	0.00016	1.95821	-1.1673	0.23637	0.22073	0.22298	-1.1673	0.23637	0.22073	0.22298	0	1.46565	-0.815367	0.15525	0.135015	0.147976	-0.81473	0.154991	0.137401	0.146927	0	0.696185	-0.324368	0.087827	0.050187	0.072929	-0.324368	0.087827	0.050187	0.072929
Kol-Type_Salan_ZrMe2	3.15686	-1.17335	0.11494	0.1138	0.11828	-1.17335	0.11494	0.1138	0.11828	9e-05	2.57629	-0.13067	-0.17297	-0.16386	-0.15694	-0.13081	-0.17294	-0.16383	-0.15693	0.00059	2.26087	-1.27583	0.23797	0.23019	0.23225	-1.27583	0.23797	0.23019	0.23225	0	1.65676	-0.798457	0.130813	0.125381	0.127945	-0.80597	0.132908	0.127937	0.130161	0	0.966255	-0.396047	0.072955	0.054301	0.067802	-0.396047	0.072955	0.054301	0.067802
Kol-Type_Salan_HfMe2	3.09755	-1.15167	0.11785	0.11155	0.11851	-1.15167	0.11785	0.11155	0.11851	-0.00032	2.68736	-0.15212	-0.17237	-0.17145	-0.15991	-0.1522	-0.17238	-0.1715	-0.15991	-0.00017	2.44556	-1.33014	0.24193	0.23132	0.23412	-1.33014	0.24193	0.23132	0.23412	0	1.56478	-0.762472	0.127409	0.118817	0.123004	-0.737887	0.121699	0.111587	0.115628	0	0.926817	-0.318477	0.058388	0.034297	0.050775	-0.318477	0.058388	0.034297	0.050775
Metallocene_ScMe	1.26787	-0.79461	0.11081	0.10181	0.10269	N/A	N/A	N/A	N/A	-0.00027	1.87032	-0.08974	-0.19504	-0.1796	-0.1757	N/A	N/A	N/A	N/A	-8e-05	1.90896	-1.33513	0.22964	0.21829	0.21813	N/A	N/A	N/A	N/A	0	1.09355	-0.934571	0.133512	0.144537	0.135047	N/A	N/A	N/A	N/A	0	0.707468	-0.344657	0.076212	0.040467	0.046543	N/A	N/A	N/A	N/A
Metallocene_YMe	2.28856	-1.1107	0.11509	0.10591	0.10554	N/A	N/A	N/A	N/A	5e-05	2.13943	-0.1539	-0.18877	-0.19547	-0.19457	N/A	N/A	N/A	N/A	0.00012	2.00667	-1.38005	0.23633	0.22445	0.22356	N/A	N/A	N/A	N/A	0	1.35187	-1.17315	0.192951	0.195322	0.180941	N/A	N/A	N/A	N/A	0	0.774766	-0.359089	0.059968	0.034726	0.037489	N/A	N/A	N/A	N/A
Metallocene_TiMe2	1.27632	-0.69023	0.11751	0.11649	0.11124	-0.69026	0.11645	0.11125	0.11748	-0.00027	1.89075	-0.0349	-0.13976	-0.14243	-0.159	-0.03504	-0.14249	-0.15891	-0.13976	-1e-05	1.88571	-1.16112	0.22434	0.23458	0.21824	-1.16122	0.23457	0.21827	0.22433	0	1.16633	-0.632946	0.100967	0.086967	0.086617	-0.606504	0.07667	0.082255	0.094236	0	0.476671	-0.225238	0.084108	0.083344	0.075538	-0.2252	0.083377	0.075604	0.084059
Metallocene_ZrMe2	3.19611	-1.14273	0.11238	0.12104	0.11053	-1.14268	0.12106	0.11053	0.11238	-0.00035	2.3243	-0.12418	-0.16013	-0.13596	-0.16866	-0.12414	-0.13603	-0.16866	-0.16019	-0.00078	1.99178	-1.20449	0.23197	0.24297	0.22634	-1.20449	0.24297	0.22634	0.23197	0	1.10135	-0.637232	0.10289	0.091153	0.089665	-0.663171	0.102314	0.094276	0.10713	0	0.566037	-0.293933	0.08006	0.085781	0.064715	-0.293935	0.085781	0.064715	0.08006
Metallocene_HfMe2	3.1395	-1.12087	0.11474	0.11898	0.11093	-1.12088	0.119	0.11094	0.11474	0.0002	2.48961	-0.14821	-0.15719	-0.14489	-0.17229	-0.14832	-0.14481	-0.17221	-0.15711	-9e-05	2.33282	-1.29072	0.23467	0.2457	0.22861	-1.29072	0.2457	0.22861	0.23467	0	1.0558	-0.639559	0.107224	0.101343	0.088673	-0.639017	0.098148	0.09022	0.109143	0	0.531941	-0.222613	0.060729	0.080995	0.060278	-0.222613	0.080995	0.060278	0.06073
[truncated: 21 more columns]

## Sheet: ACM
	IBO-WBI				NBO-WBI				IBO-BC
	M-C(Me)	M-C2(Eth)	C1(Eth)-C2(Eth)	(Me)-C(Eth)	M-C(Me)	M-C2(Eth)	C1(Eth)-C2(Eth)	(Me)-C(Eth)	M-C(Me)
Phosphinimide_ScMe_Eth	0.65195	0.10065	1.91312	< 2.00e-02	0.4968	0.0766	1.9445	0.0016	1.583
Phosphinimide_YMe_Eth	0.31919	0.06478	1.9524	< 2.00e-02	0.435	0.0667	1.9673	0.0148	1.832
Phosphinimide_TiMe_Eth+	0.79336	0.15466	1.83269	< 2.00e-02	0.7518	0.1494	1.8641	0.0036	1.389
Phosphinimide_ZrMe_Eth+	0.34146	0.08649	1.88605	< 2.00e-02	0.7269	0.1394	1.8733	0.0014	1.808
Phosphinimide_HfMe_Eth+	0.37941	0.09018	1.86649	< 2.00e-02	0.6682	0.1421	1.8602	0.0014	1.781
Kol-Type_Salan_ScMe_Eth	0.65557	0.07234	1.96103	< 2.00e-02	0.4626	0.054	1.9964	0.0064	1.577
Kol-Type_Salan_YMe_Eth	0.31757	0.05453	1.98248	< 2.00e-02	0.4083	0.0464	2.004	0.0032	1.839
Kol-Type_Salan_TiMe_Eth+	0.8285	0.25557	1.74391	0.14368	0.7988	0.2483	1.7764	0.1448	1.314
Kol-Type_Salan_ZrMe_Eth+	0.22475	0.10523	1.80878	0.12571	0.7299	0.2213	1.7971	0.1258	1.797
Kol-Type_Salan_HfMe_Eth+	0.26437	0.09286	1.84912	0.08088	0.6328	0.1769	1.8432	0.087	1.802
Metallocene_ScMe_Eth	0.70748	0.11245	1.90555	0.02959	0.4982	0.0852	1.9495	0.0314	1.504
Metallocene_YMe_Eth	0.30169	0.07561	1.94223	< 2.00e-02	0.4698	0.0892	1.9544	0.0212	1.832
Metallocene_TiMe_Eth+	0.80224	0.16032	1.83615	0.04018	0.7075	0.1529	1.8809	0.0398	1.327
Metallocene_ZrMe_Eth+	0.29669	0.08354	1.91946	< 2.00e-02	0.6968	0.1422	1.8988	0.0179	1.815
Metallocene_HfMe_Eth+	0.33922	0.08595	1.90597	< 2.00e-02	0.5844	0.1409	1.899	0.0207	1.786
	IBO-charges												QTAIM-charges												NPA-charges												ESP-charges												Mulliken-charges
	M	C(Me)	H1(Me)	H2(Me)	H3(Me)	C1(Eth)	C2(Eth)	H1(Eth)	H2(Eth)	H3(Eth)	H4(Eth)	Total	M	C(Me)	H1(Me)	H2(Me)	H3(Me)	C1(Eth)	C2(Eth)	H1(Eth)	H2(Eth)	H3(Eth)	H4(Eth)	Total	M	C(Me)	H1(Me)	H2(Me)	H3(Me)	C1(Eth)	C2(Eth)	H1(Eth)	H2(Eth)	H3(Eth)	H4(Eth)	Total	M	C(Me)	H1(Me)	H2(Me)	H3(Me)	C1(Eth)	C2(Eth)	H1(Eth)	H2(Eth)	H3(Eth)	H4(Eth)	Total	M
Phosphinimide_ScMe_Eth	1.18884	-0.82846	0.10466	0.09565	0.09029	-0.27938	-0.26605	0.15974	0.14803	0.15638	0.14727	0.00015	1.86686	-0.05108	-0.19841	-0.19938	-0.20683	0.05042	0.05886	-0.03683	-0.0484	-0.04068	-0.04765	0.00109	1.7563	-1.32098	0.22361	0.21411	0.2075	-0.45078	-0.44217	0.24	0.22733	0.2364	0.22692	0	1.03193	-0.550636	0.032222	0.034221	0.034846	-0.278971	-0.298054	0.155094	0.153436	0.179541	0.176404	0	0.443475
Phosphinimide_YMe_Eth	2.21068	-1.08172	0.10309	0.10188	0.09772	-0.26668	-0.30059	0.15313	0.16401	0.14602	0.15259	7e-05	2.1625	-0.11981	-0.21154	-0.20119	-0.20102	0.04899	0.04719	-0.0392	-0.00998	-0.05906	-0.03997	0.00043	1.91288	-1.3651	0.2227	0.21928	0.21515	-0.42301	-0.46009	0.23091	0.23986	0.22593	0.23067	0	1.08884	-0.745434	0.087825	0.073507	0.088865	-0.235721	-0.320662	0.148399	0.170553	0.164277	0.163588	0	0.469414
Phosphinimide_TiMe_Eth+	1.2576	-0.72392	0.13807	0.12416	0.11512	-0.26961	-0.27432	0.16914	0.16436	0.1655	0.15958	1.00018	1.88266	-0.05011	-0.12624	-0.12842	-0.15559	0.03192	0.03964	-0.01264	-0.01218	-0.01714	-0.02504	1.00035	1.66359	-1.14768	0.25541	0.23193	0.22397	-0.43333	-0.44903	0.25135	0.24526	0.2467	0.24346	1	0.538813	-0.592178	0.122342	0.124775	0.111097	-0.214784	-0.213934	0.173493	0.159677	0.172834	0.15876	1	0.312583
Phosphinimide_ZrMe_Eth+	3.22352	-1.16372	0.13819	0.12697	0.11192	-0.33169	-0.31917	0.16702	0.16921	0.16534	0.1664	0.99995	2.33879	-0.14907	-0.12653	-0.13294	-0.16344	0.01054	0.01859	-0.01878	-0.00495	-0.0174	-0.00982	1.00019	1.9005	-1.22048	0.26174	0.24307	0.23314	-0.45776	-0.44474	0.25201	0.25118	0.24858	0.24856	1	0.635576	-0.587757	0.121698	0.117117	0.10585	-0.209204	-0.207257	0.173241	0.16035	0.17983	0.16804	1	0.404296
Phosphinimide_HfMe_Eth+	3.16504	-1.14163	0.13759	0.12708	0.11479	-0.34514	-0.32123	0.1684	0.17017	0.16757	0.1679	0.99994	2.47133	-0.17428	-0.13238	-0.14151	-0.16225	-0.00322	0.00704	-0.01805	-0.00338	-0.01308	-0.0064	1.00003	2.13043	-1.29232	0.26565	0.24578	0.23799	-0.47777	-0.44914	0.25566	0.25442	0.25161	0.25141	1	0.584386	-0.584944	0.120863	0.113718	0.103502	-0.209053	-0.185286	0.169869	0.161003	0.174784	0.155134	1	0.258854
Kol-Type_Salan_ScMe_Eth	1.32769	-0.83272	0.09692	0.10416	0.1028	-0.25211	-0.29239	0.16265	0.15655	0.13986	0.15352	0.00027	1.99966	-0.05945	-0.19447	-0.19411	-0.1889	0.07544	0.0656	-0.01882	-0.02605	-0.0643	-0.03597	0.00062	1.9629	-1.35384	0.21332	0.22002	0.21785	-0.40129	-0.46941	0.23605	0.22985	0.21996	0.23175	0	1.28099	-0.874748	0.128427	0.122789	0.118701	-0.264227	-0.303188	0.168325	0.175808	0.150073	0.17391	0	0.717996
Kol-Type_Salan_YMe_Eth	2.16745	-1.08994	0.10429	0.10103	0.09911	-0.27605	-0.28666	0.15048	0.15597	0.15384	0.15325	0.00028	2.2955	-0.11267	-0.20108	-0.2013	-0.19829	0.07166	0.06294	-0.04525	-0.0355	-0.0341	-0.0378	0.00052	2.06883	-1.39613	0.22183	0.21967	0.21485	-0.43262	-0.4404	0.22575	0.23152	0.22943	0.22929	0	1.36166	-0.889738	0.107207	0.116683	0.138248	-0.233512	-0.280744	0.149995	0.144614	0.155801	0.152117	0	0.794055
Kol-Type_Salan_TiMe_Eth+	1.38279	-0.61787	0.10527	0.15694	0.15572	-0.18254	-0.35789	0.17167	0.17138	0.15338	0.15451	1.00037	2.09131	-0.01567	-0.21736	-0.05542	-0.05443	0.04172	0.06352	0.00137	0.00815	-0.05306	-0.05092	1.00045	1.86183	-0.97737	0.20112	0.25111	0.25142	-0.32357	-0.57568	0.24799	0.24666	0.24354	0.24131	1	1.13878	-0.663895	0.131333	0.188726	0.185977	-0.149403	-0.343593	0.16499	0.176377	0.157584	0.171473	1	0.706263
Kol-Type_Salan_ZrMe_Eth+	3.18966	-1.1055	0.05639	0.15655	0.15588	-0.20842	-0.4839	0.17374	0.17437	0.15566	0.15432	1.00019	2.57515	-0.10533	-0.247	-0.06738	-0.06465	0.03145	0.02571	0.00972	0.01447	-0.05347	-0.04793	1.00051	2.14594	-1.09078	0.20288	0.26203	0.26201	-0.32054	-0.61147	0.24936	0.24921	0.25054	0.24708	1	1.26237	-0.696316	0.122063	0.185336	0.183372	-0.120964	-0.391752	0.163281	0.170822	0.180438	0.191897	1	0.939487
Kol-Type_Salan_HfMe_Eth+	3.14303	-1.1218	0.06725	0.15355	0.1516	-0.21145	-0.45564	0.17496	0.17626	0.15361	0.15745	1.00007	2.70608	-0.15105	-0.24523	-0.0816	-0.08112	0.02688	0.02051	0.0127	0.01964	-0.05276	-0.03942	1.00032	2.41583	-1.22859	0.21005	0.2641	0.26271	-0.31893	-0.6129	0.2496	0.24952	0.25011	0.24966	1	1.18479	-0.672007	0.113778	0.168614	0.166288	-0.106512	-0.35844	0.158503	0.166875	0.177248	0.186777	1	0.897298
Metallocene_ScMe_Eth	1.21308	-0.76277	0.10984	0.10133	0.09725	-0.23618	-0.29616	0.15296	0.15517	0.15747	0.1421	0.00035	1.88006	-0.05821	-0.17954	-0.17366	-0.18815	0.055	0.03779	-0.03196	-0.03035	-0.00746	-0.06164	0.00081	1.82287	-1.29818	0.23216	0.21809	0.21421	-0.39602	-0.48179	0.23209	0.23261	0.24364	0.22533	0	0.89768	-0.653008	0.072864	0.07855	0.077471	-0.244212	-0.271712	0.148008	0.162153	0.115624	0.141307	0	0.526902
Metallocene_YMe_Eth	2.23077	-1.09048	0.10968	0.10321	0.10102	-0.25376	-0.32019	0.15579	0.16048	0.1589	0.14816	0.00018	2.14167	-0.11784	-0.18741	-0.19194	-0.19758	0.04632	0.02381	-0.03024	-0.02183	-0.01214	-0.05408	0.00058	1.87251	-1.33715	0.23467	0.22231	0.21998	-0.39838	-0.48403	0.2348	0.23796	0.24602	0.23184	0	0.900392	-0.631244	0.068786	0.064879	0.06453	-0.212635	-0.269776	0.138358	0.161567	0.119107	0.142138	0	0.554269
Metallocene_TiMe_Eth+	1.25862	-0.67176	0.13417	0.1254	0.12183	-0.21718	-0.28795	0.15959	0.16619	0.16172	0.15391	1.00016	1.87685	-0.04818	-0.12484	-0.11925	-0.13283	0.0515	0.02468	-0.00719	-0.00507	0.00286	-0.03614	1.00023	1.88109	-1.17011	0.2576	0.2304	0.22808	-0.36547	-0.4749	0.23764	0.24214	0.25253	0.23805	1	0.406548	-0.654298	0.143489	0.147894	0.146946	-0.196728	-0.175612	0.160572	0.175653	0.096079	0.147713	1	0.477467
Metallocene_ZrMe_Eth+	3.24267	-1.16991	0.13306	0.12246	0.12129	-0.26976	-0.33922	0.16135	0.17131	0.16081	0.16133	1.00042	2.28486	-0.13772	-0.12221	-0.13565	-0.14526	0.03525	0.00029	-0.01124	0.00502	-0.00154	-0.02258	1.0006	2.04813	-1.2295	0.26401	0.23962	0.23767	-0.38034	-0.48307	0.24127	0.24782	0.25541	0.24626	1	0.487069	-0.602542	0.12547	0.120202	0.125219	-0.217838	-0.125197	0.166613	0.187323	0.074493	0.143825	1	0.479019
Metallocene_HfMe_Eth+	3.1872	-1.14241	0.13203	0.12355	0.12155	-0.26836	-0.35002	0.16282	0.17273	0.16202	0.16211	0.99978	2.46153	-0.16768	-0.12861	-0.13677	-0.14832	0.02472	-0.01274	-0.00776	0.00791	0.00272	-0.02179	1.0001	2.36732	-1.33244	0.27008	0.24356	0.24051	-0.38042	-0.50212	0.24285	0.24923	0.25963	0.24873	1	0.443533	-0.587781	0.127813	0.119058	0.118533	-0.20117	-0.127887	0.166284	0.184909	0.080409	0.146274	1	0.43521
[truncated: 35 more columns]

## Sheet: TSM
	NBO-WBI				IBO-WBI				IBO-BC
	M-C(Me)	M-C2(Eth)	C1(Eth)-C2(Eth)	(Me)-C(Eth)	M-C(Me)	M-C2(Eth)	C1(Eth)-C2(Eth)	(Me)-C(Eth)	M-C(Me)
Phosphinimide_ScMe_Eth_INS_TS	0.3636	0.3314	1.4647	0.4886	0.4245	0.40477	1.4367	0.47135	1.303
Phosphinimide_YMe_Eth_INS_TS	0.3556	0.2909	1.5026	0.4532	0.1972	0.18756	1.48897	0.45567	1.483
Phosphinimide_TiMe_Eth+_INS_TS	0.6235	0.4145	1.52	0.3727	0.61628	0.43403	1.49181	0.37178	1.276
Phosphinimide_ZrMe_Eth+_INS_TS	0.5344	0.4613	1.4359	0.4546	0.18734	0.20431	1.44288	0.47757	1.482
Phosphinimide_HfMe_Eth+_INS_TS	0.4997	0.4375	1.4275	0.4586	0.20145	0.21733	1.42948	0.47493	1.479
Kol-Type_Salan_ScMe_Eth_INS_TS	0.3757	0.3027	1.5124	0.4441	0.46677	0.38236	1.48363	0.42032	1.325
Kol-Type_Salan_YMe_Eth_INS_TS	0.3799	0.2671	1.5519	0.4082	0.20258	0.17273	1.53204	0.41386	1.53
Kol-Type_Salan_TiMe_Eth+_INS_TS	0.699	0.3789	1.6055	0.2964	0.71938	0.39488	1.57793	0.29225	1.256
Kol-Type_Salan_ZrMe_Eth+_INS_TS	0.5717	0.4387	1.489	0.4062	0.18586	0.18056	1.49132	0.43275	1.536
Kol-Type_Salan_HfMe_Eth+_INS_TS	0.5036	0.4072	1.4707	0.4212	0.19733	0.19193	1.46881	0.43964	1.52
Metallocene_ScMe_Eth_INS_TS	0.3766	0.3503	1.4727	0.4741	0.47493	0.44729	1.44063	0.44732	1.283
Metallocene_YMe_Eth_INS_TS	0.3485	0.3472	1.4494	0.4969	0.1723	0.18792	1.44093	0.49955	1.436
Metallocene_TiMe_Eth+_INS_TS	0.6251	0.3371	1.6217	0.274	0.69302	0.37512	1.58135	0.26254	1.277
Metallocene_ZrMe_Eth+_INS_TS	0.5527	0.4646	1.454	0.4207	0.18601	0.1919	1.47154	0.44413	1.502
Metallocene_HfMe_Eth+_INS_TS	0.4714	0.4013	1.4614	0.4248	0.20479	0.20579	1.4664	0.43216	1.506
CGC_ScMe_Eth+_INS_TS	0.3821	0.3294	1.4748	0.4768	0.44171	0.3983	1.44387	0.4589	1.308
CGC_YMe_Eth+_INS_TS	0.3622	0.2945	1.5038	0.4521	0.19303	0.19153	1.48784	0.4583	1.49
CGC_TiMe_Eth+_INS_TS	0.6152	0.4407	1.4875	0.3967	0.61716	0.46391	1.4581	0.39562	1.252
CGC_ZrMe_Eth+_INS_TS	0.5479	0.4686	1.4444	0.4341	0.17406	0.21424	1.45417	0.46592	1.513
CGC_HfMe_Eth+_INS_TS	0.5006	0.4394	1.4325	0.4474	0.18973	0.22516	1.43508	0.47012	1.503
Bis_Amide_ScMe_Eth_INS_TS	0.3025	0.275	1.4952	0.4706	0.42661	0.3889	1.45935	0.4411	1.346
Bis_Amide_YMe_Eth_INS_TS	0.2958	0.2687	1.506	0.4604	0.19623	0.20466	1.48742	0.45532	1.495
Bis_Amide_TiMe_Eth+_INS_TS	0.5463	0.3819	1.5292	0.3703	0.6045	0.4338	1.49499	0.35838	1.309
Bis_Amide_ZrMe_Eth+_INS_TS	0.5042	0.4201	1.4697	0.4214	0.1836	0.23074	1.46765	0.44762	1.533
Bis_Amide_HfMe_Eth+_INS_TS	0.4516	0.373	1.4879	0.4015	0.19869	0.22819	1.48548	0.41241	1.566
OOOO_ScMe_Eth_INS_TS	0.3542	0.3063	1.5052	0.4543	0.48166	0.41444	1.47467	0.4243	1.313
OOOO_YMe_Eth_INS_TS	0.3297	0.268	1.5141	0.451	0.18742	0.17423	1.49523	0.45177	1.493
OOOO_TiMe_Eth+_INS_TS	0.7226	0.3751	1.634	0.2648	0.76001	0.40166	1.6018	0.25959	1.252
OOOO_ZrMe_Eth+_INS_TS	0.5237	0.4531	1.4604	0.4361	0.17002	0.17732	1.46529	0.46036	1.51
OOOO_HfMe_Eth+_INS_TS	0.4846	0.4132	1.4617	0.4297	0.18559	0.18787	1.46254	0.44714	1.517
Exxon-Type_Salan_ScMe_Eth_INS_TS	0.3467	0.2955	1.4919	0.4659	0.45899	0.3884	1.46245	0.43676	1.308
Exxon-Type_Salan_YMe_Eth_INS_TS	0.3461	0.2645	1.5153	0.4464	0.1946	0.17065	1.49508	0.45038	1.487
Exxon-Type_Salan_TiMe_Eth+_INS_TS	0.6375	0.4192	1.5352	0.3634	0.67246	0.44633	1.50859	0.35528	1.219
Exxon-Type_Salan_ZrMe_Eth+_INS_TS	0.5313	0.4368	1.4522	0.4448	0.18095	0.17963	1.45181	0.47318	1.487
Exxon-Type_Salan_HfMe_Eth+_INS_TS	0.4649	0.3955	1.4419	0.4531	0.19223	0.18971	1.43781	0.47134	1.482
	IBO-charges												QTAIM-charges												NPA-charges												ESP-charges												Mulliken-charges
	M	C(Me)	H1(Me)	H2(Me)	H3(Me)	C1(Eth)	C2(Eth)	H1(Eth)	H2(Eth)	H3(Eth)	H4(Eth)	Total	M	C(Me)	H1(Me)	H2(Me)	H3(Me)	C1(Eth)	C2(Eth)	H1(Eth)	H2(Eth)	H3(Eth)	H4(Eth)	Total	M	C(Me)	H1(Me)	H2(Me)	H3(Me)	C1(Eth)	C2(Eth)	H1(Eth)	H2(Eth)	H3(Eth)	H4(Eth)	Total	M	C(Me)	H1(Me)	H2(Me)	H3(Me)	C1(Eth)	C2(Eth)	H1(Eth)	H2(Eth)	H3(Eth)	H4(Eth)	Total	M
Phosphinimide_ScMe_Eth_INS_TS	1.11478	-0.60377	0.11022	0.13099	0.12601	-0.18261	-0.51113	0.14584	0.1446	0.13122	0.13646	-0.00051	1.85621	0.03222	-0.2024	-0.10023	-0.11616	0.02762	0.0555	-0.05041	-0.06647	-0.12461	-0.11814	-0.00017	1.53692	-0.96207	0.20813	0.2416	0.23445	-0.38311	-0.78328	0.2373	0.23604	0.23484	0.24107	0	0.967722	-0.522742	0.055153	0.125951	0.10027	-0.05078	-0.716816	0.122983	0.110736	0.187697	0.189174	0	0.373374
Phosphinimide_YMe_Eth_INS_TS	2.20453	-0.80183	0.10474	0.14368	0.12369	-0.20218	-0.64781	0.14517	0.14624	0.13529	0.13801	-0.00017	2.14514	-0.0176	-0.19802	-0.08762	-0.15372	0.03817	0.02579	-0.05381	-0.05637	-0.12898	-0.12151	2e-05	1.71229	-1.01601	0.2152	0.2539	0.22825	-0.37848	-0.79274	0.23596	0.23573	0.23806	0.24087	0	1.12452	-0.463509	0.017931	0.132799	0.036794	-0.049119	-0.717777	0.114663	0.103763	0.191891	0.18568	0	0.404205
Phosphinimide_TiMe_Eth+_INS_TS	1.19717	-0.57767	0.11945	0.15414	0.14856	-0.17621	-0.42269	0.16706	0.16783	0.15242	0.15789	0.99989	1.88381	-0.01795	-0.19391	-0.05096	-0.06385	0.01754	0.0486	-0.00722	-0.01154	-0.06729	-0.04558	1.00033	1.40424	-0.8914	0.22874	0.25826	0.25198	-0.34939	-0.65182	0.25157	0.25329	0.24859	0.25469	1	0.593496	-0.543552	0.137687	0.172469	0.167833	-0.06075	-0.458575	0.150293	0.146061	0.179012	0.184191	1	0.266388
Phosphinimide_ZrMe_Eth+_INS_TS	3.23726	-0.84348	0.07447	0.16914	0.1544	-0.20553	-0.71623	0.167	0.16642	0.15205	0.15832	0.99987	2.33423	-0.03687	-0.20764	-0.03078	-0.0625	-0.00074	-0.00279	-0.00542	-0.0196	-0.08009	-0.05961	1.00001	1.69387	-0.92266	0.22364	0.27714	0.26276	-0.34933	-0.73719	0.25727	0.25432	0.25761	0.26354	1	0.565734	-0.561354	0.144474	0.192097	0.167122	-0.048675	-0.512346	0.154286	0.144215	0.179697	0.188693	1	0.3797
Phosphinimide_HfMe_Eth+_INS_TS	3.18509	-0.83561	0.07038	0.16739	0.15751	-0.19769	-0.71719	0.1684	0.16805	0.15332	0.15816	0.99983	2.46623	-0.05753	-0.2218	-0.03625	-0.05484	-0.01623	-0.01312	-0.00193	-0.01388	-0.07841	-0.06059	1.00008	1.90693	-0.95613	0.21899	0.27472	0.26632	-0.34088	-0.78497	0.25669	0.25498	0.26132	0.26547	1	0.509823	-0.541473	0.127494	0.185763	0.159246	0.000482	-0.53858	0.138379	0.133386	0.18061	0.190837	1	0.202098
Kol-Type_Salan_ScMe_Eth_INS_TS	1.2382	-0.61473	0.10056	0.13616	0.1344	-0.17915	-0.50251	0.15114	0.1527	0.13712	0.13209	-0.00026	1.99291	0.01717	-0.22207	-0.08902	-0.10643	0.03571	0.06749	-0.03937	-0.04178	-0.11401	-0.1237	0.0001	1.75096	-0.98861	0.19033	0.24438	0.23919	-0.36979	-0.78894	0.23798	0.23947	0.23914	0.23382	0	1.7163	-0.62548	0.033665	0.151805	0.127976	-0.218705	-0.579266	0.170755	0.152153	0.142127	0.150858	0	0.655527
Kol-Type_Salan_YMe_Eth_INS_TS	2.14638	-0.84023	0.12164	0.14451	0.1142	-0.20325	-0.62888	0.15213	0.15153	0.13899	0.13404	-0.0002	2.27261	-0.02628	-0.1688	-0.08634	-0.1787	0.03797	0.03968	-0.04237	-0.04251	-0.12022	-0.12399	3e-05	1.85514	-1.04169	0.22644	0.25297	0.21784	-0.37032	-0.78788	0.2385	0.238	0.24069	0.23548	0	1.58242	-0.511247	0.051173	0.133564	0.050579	-0.237219	-0.567186	0.165641	0.16578	0.149906	0.163901	0	0.703031
Kol-Type_Salan_TiMe_Eth+_INS_TS	1.35524	-0.56342	0.10557	0.16103	0.16157	-0.17103	-0.40272	0.17336	0.17365	0.15595	0.15332	0.9999	2.08445	-0.0047	-0.21798	-0.0413	-0.03651	0.02505	0.06343	0.00431	0.00777	-0.06092	-0.06166	0.9999	1.79933	-0.89109	0.19781	0.25491	0.25784	-0.32972	-0.64381	0.25304	0.25273	0.24994	0.24458	1	1.32814	-0.600128	0.108759	0.181531	0.182221	-0.141536	-0.388618	0.161653	0.173889	0.150258	0.163782	1	0.714084
Kol-Type_Salan_ZrMe_Eth+_INS_TS	3.16991	-0.88731	0.06336	0.17283	0.16346	-0.20252	-0.70624	0.17167	0.17236	0.15612	0.14966	1.00007	2.55339	-0.03669	-0.22562	-0.02324	-0.04845	0.00108	0.01403	0.00465	-0.00363	-0.07163	-0.08062	1.00055	2.03735	-0.9324	0.20598	0.27666	0.2673	-0.33647	-0.74233	0.2571	0.25651	0.26008	0.25317	1	1.388	-0.623233	0.117934	0.202814	0.190371	-0.159352	-0.440041	0.185223	0.170854	0.157744	0.171449	1	0.946874
Kol-Type_Salan_HfMe_Eth+_INS_TS	3.12087	-0.86561	0.05681	0.17195	0.16434	-0.19417	-0.71473	0.17282	0.17324	0.15557	0.14971	1.00005	2.67755	-0.06508	-0.23927	-0.02633	-0.04472	-0.0076	0.00563	0.00737	0.00442	-0.07568	-0.08286	1.00026	2.26276	-0.97347	0.19445	0.27582	0.26881	-0.32795	-0.80263	0.25678	0.25658	0.26221	0.25594	1	1.40639	-0.616031	0.115021	0.197867	0.190189	-0.13293	-0.451351	0.178465	0.168061	0.157704	0.167204	1	0.888048
Metallocene_ScMe_Eth_INS_TS	1.13401	-0.57887	0.11196	0.13153	0.1298	-0.17558	-0.47669	0.14495	0.1494	0.15014	0.13047	-0.00027	1.86023	0.01772	-0.19184	-0.09356	-0.10266	0.01474	0.03532	-0.0526	-0.04484	-0.06147	-0.12562	0.00042	1.60091	-0.96527	0.20974	0.24202	0.24119	-0.37479	-0.77567	0.23739	0.23931	0.25682	0.23502	0	1.15808	-0.484603	-0.013903	0.098139	0.117017	-0.130613	-0.553003	0.106614	0.14027	0.12211	0.13418	0	0.493011
Metallocene_YMe_Eth_INS_TS	2.2334	-0.77065	0.08734	0.13821	0.14369	-0.19827	-0.69318	0.14341	0.1463	0.15045	0.13371	0.00011	2.12366	0.00014	-0.209	-0.1053	-0.09035	0.01977	0.00336	-0.0661	-0.04563	-0.08191	-0.13388	9e-05	1.67372	-0.98219	0.21	0.2473	0.25553	-0.37424	-0.80913	0.23685	0.24093	0.26019	0.24099	0	1.05948	-0.396362	-0.014607	0.068784	0.108052	-0.096382	-0.585656	0.092611	0.137134	0.130672	0.142024	0	0.536257
Metallocene_TiMe_Eth+_INS_TS	1.20146	-0.57716	0.12167	0.14431	0.14271	-0.17047	-0.36766	0.16248	0.16849	0.16359	0.14913	0.99989	1.87818	-0.03532	-0.17709	-0.06177	-0.07322	0.01784	0.03068	-0.00471	-0.00212	-0.00632	-0.05822	1.00071	1.71955	-0.97645	0.2267	0.24468	0.24399	-0.33302	-0.62094	0.24522	0.24806	0.26092	0.24092	1	0.374282	-0.390318	0.056678	0.112388	0.129804	-0.134096	-0.264365	0.142844	0.165123	0.098119	0.136747	1	0.430591
Metallocene_ZrMe_Eth+_INS_TS	3.23593	-0.85092	0.07095	0.15528	0.1577	-0.20526	-0.70183	0.16215	0.1693	0.16247	0.14993	1.00055	2.26573	-0.04389	-0.19751	-0.04693	-0.05093	-0.00818	-0.01511	-0.01495	-0.002	-0.02559	-0.08548	1.00072	1.69979	-0.92068	0.23415	0.26499	0.26753	-0.33586	-0.71586	0.25131	0.25774	0.27165	0.2548	1	0.556513	-0.401318	0.058175	0.12142	0.148558	-0.111488	-0.33673	0.13397	0.166196	0.099963	0.13481	1	0.475652
Metallocene_HfMe_Eth+_INS_TS	3.18533	-0.84982	0.07056	0.15589	0.15721	-0.1965	-0.69541	0.16381	0.16977	0.16273	0.14924	0.99992	2.43782	-0.08237	-0.20346	-0.04701	-0.05334	-0.01837	-0.02475	-0.00621	0.00053	-0.02367	-0.07786	0.99969	2.10914	-0.99212	0.22144	0.26517	0.26597	-0.32978	-0.78685	0.25085	0.25584	0.2739	0.25519	1	0.460611	-0.365997	0.064171	0.115544	0.137108	-0.10715	-0.310434	0.139713	0.164388	0.094837	0.131326	1	0.371913
CGC_ScMe_Eth_INS_TS	1.15522	-0.62251	0.11629	0.14376	0.13262	-0.18402	-0.51437	0.14907	0.14983	0.13425	0.144	-0.00017	1.85198	0.01093	-0.18849	-0.08187	-0.10946	0.02018	0.05325	-0.04256	-0.05534	-0.11814	-0.1072	0.00027	1.53839	-0.98281	0.21503	0.25598	0.24036	-0.38241	-0.79033	0.23919	0.24039	0.23878	0.24945	0	1.06443	-0.618495	0.070928	0.16013	0.145033	-0.046589	-0.687555	0.132345	0.106694	0.190503	0.180149	0	0.362113
CGC_YMe_Eth_INS_TS	2.20553	-0.80617	0.11208	0.15008	0.115	-0.20266	-0.65406	0.14687	0.14961	0.13749	0.14258	-1e-05	2.12996	-0.01208	-0.18622	-0.07615	-0.17927	0.03666	0.02646	-0.05166	-0.04968	-0.12711	-0.11582	9e-05	1.69422	-1.01428	0.22108	0.26027	0.21983	-0.37793	-0.80176	0.2369	0.23888	0.24212	0.24698	0	1.10249	-0.390433	0.009598	0.117452	0.034029	0.0021	-0.728617	0.093143	0.100117	0.199325	0.185655	0	0.405593
CGC_TiMe_Eth_INS_TS	1.24756	-0.57644	0.1211	0.17369	0.16364	-0.17635	-0.43053	0.1747	0.17177	0.15698	0.16722	1.00013	1.88404	-0.02401	-0.18516	-0.01959	-0.0358	0.00162	0.04141	0.006	-0.00887	-0.05375	-0.03234	1.00008	1.51398	-0.89331	0.22433	0.28032	0.26505	-0.35219	-0.67662	0.25688	0.25862	0.2538	0.26731	1	0.453412	-0.596381	0.179137	0.204211	0.211842	-0.058098	-0.424272	0.169773	0.148092	0.182624	0.183321	1	0.329671
CGC_ZrMe_Eth_INS_TS	3.23385	-0.87421	0.07004	0.17769	0.15942	-0.20818	-0.70641	0.17132	0.17203	0.15443	0.16436	0.99989	2.32527	-0.04166	-0.20717	-0.01851	-0.05135	-0.00297	0.00172	0.00267	-0.00985	-0.07139	-0.04532	1.00002	1.66979	-0.93501	0.22162	0.28765	0.26747	-0.34196	-0.72957	0.25961	0.2592	0.26063	0.27061	1	1.01051	-0.732569	0.143489	0.225605	0.227027	0.086059	-0.642567	0.139175	0.099069	0.215059	0.207941	1	0.396531
CGC_HfMe_Eth_INS_TS	3.1822	-0.86482	0.06695	0.18037	0.16273	-0.20112	-0.71598	0.17312	0.17298	0.15583	0.16588	0.99998	2.47509	-0.06583	-0.21794	-0.01643	-0.04438	-0.01967	-0.01325	0.00756	-0.00731	-0.06935	-0.04626	1.00033	1.94625	-0.97658	0.2152	0.29024	0.27149	-0.33789	-0.79303	0.2598	0.25964	0.26433	0.27534	1	0.908236	-0.678938	0.14871	0.214435	0.219348	0.10387	-0.652783	0.136915	0.099827	0.224954	0.21306	1	0.283712
Bis_Amide_ScMe_Eth_INS_TS	1.18381	-0.64705	0.10891	0.13132	0.14527	-0.18068	-0.52234	0.15291	0.15374	0.14527	0.14215	-0.00047	1.84422	0.00767	-0.22145	-0.12892	-0.07789	0.01619	0.0425	-0.04931	-0.03315	-0.10498	-0.11082	-0.00031	1.84382	-1.04791	0.19656	0.23689	0.2568	-0.3775	-0.83423	0.23905	0.24057	0.24815	0.24465	0	1.18983	-0.472898	0.013249	0.10985	0.13039	-0.120114	-0.544211	0.114705	0.138173	0.144888	0.152812	0	0.546269
Bis_Amide_YMe_Eth_INS_TS	2.25191	-0.79981	0.10985	0.10985	0.15114	-0.2	-0.65334	0.15144	0.15144	0.14379	0.14377	1e-05	2.16992	-0.01693	-0.18894	-0.18882	-0.0738	0.03106	0.01365	-0.04368	-0.04368	-0.11379	-0.11382	0.00031	1.9398	-1.04706	0.20964	0.20965	0.26051	-0.37529	-0.83514	0.23825	0.23825	0.2466	0.2466	0	1.48685	-0.330399	-0.019043	-0.023886	0.12125	-0.219886	-0.449193	0.135851	0.136883	0.115432	0.110997	0	0.67765
Bis_Amide_TiMe_Eth+_INS_TS	1.28388	-0.62356	0.11414	0.15959	0.16812	-0.16721	-0.45592	0.17305	0.17748	0.16463	0.1616	1	1.88677	-0.04083	-0.21524	-0.05521	-0.03287	-0.0064	0.02468	-0.00488	0.01176	-0.04991	-0.04386	1.00028	1.85597	-0.99815	0.20422	0.2634	0.27484	-0.33354	-0.74161	0.25353	0.25704	0.26337	0.25753	1	0.373722	-0.460745	0.119657	0.160095	0.166419	-0.044406	-0.401954	0.126998	0.168656	0.172757	0.171815	1	0.596111
Bis_Amide_ZrMe_Eth+_INS_TS	3.26973	-0.89648	0.08121	0.1545	0.18236	-0.20418	-0.69703	0.1727	0.17437	0.1638	0.16162	0.99984	2.37165	-0.06641	-0.2129	-0.08474	-0.00847	-0.01185	-0.01371	-0.00805	0.01065	-0.06234	-0.05934	1.00011	2.08091	-1.00193	0.209	0.2621	0.29079	-0.338	-0.78445	0.25539	0.2587	0.2688	0.26492	1	1.28418	-0.696658	0.188048	0.177232	0.231121	-0.052584	-0.500185	0.122156	0.169524	0.180397	0.174452	1	0.728047
Bis_Amide_HfMe_Eth+_INS_TS	3.21635	-0.91198	0.06791	0.15831	0.18129	-0.19478	-0.68702	0.17555	0.17743	0.16615	0.16406	1.00016	2.50003	-0.09197	-0.23936	-0.07282	-0.01265	-0.02985	-0.02726	-0.00078	0.01852	-0.05197	-0.05255	1.00036	2.3232	-1.07095	0.19661	0.26791	0.29113	-0.32423	-0.8294	0.25652	0.2597	0.27334	0.26907	1	0.89574	-0.604481	0.153082	0.183878	0.210276	-0.03915	-0.443094	0.127233	0.164743	0.168373	0.175384	1	0.538249
OOOO_ScMe_Eth_INS_TS	1.25643	-0.61546	0.11066	0.13584	0.13825	-0.17944	-0.49395	0.15015	0.15277	0.13462	0.14474	0	2.00057	0.01959	-0.20754	-0.09318	-0.10424	0.02495	0.04755	-0.04033	-0.0483	-0.11404	-0.10942	0.00037	1.80245	-1.00824	0.19742	0.24412	0.24325	-0.37455	-0.79841	0.23683	0.23932	0.23583	0.24633	0	1.5943	-0.638765	0.04402	0.156449	0.134989	-0.182964	-0.583201	0.162416	0.13869	0.137657	0.160855	0	0.648426
OOOO_YMe_Eth_INS_TS	2.1402	-0.82044	0.12037	0.1472	0.12005	-0.20419	-0.66023	0.14847	0.14895	0.13487	0.14261	0.00042	2.28988	-0.02819	-0.16645	-0.08252	-0.17089	0.03462	0.02025	-0.04923	-0.04795	-0.12725	-0.11871	0.00071	1.9073	-1.04219	0.22496	0.25596	0.22433	-0.37717	-0.82321	0.2363	0.23681	0.23835	0.24632	0	1.54357	-0.475659	0.032478	0.137347	0.038241	-0.198942	-0.584883	0.149573	0.151365	0.146079	0.165005	0	0.733742
OOOO_TiMe_Eth+_INS_TS	1.39231	-0.57854	0.12841	0.1544	0.16041	-0.17051	-0.38096	0.17039	0.17396	0.1562	0.16694	0.99999	2.10795	-0.02875	-0.19059	-0.05269	-0.04314	0.02549	0.03967	0.00166	0.00894	-0.05189	-0.04018	1.00039	1.81156	-0.92544	0.22284	0.25023	0.25799	-0.32641	-0.6281	0.25031	0.25266	0.25064	0.25841	1	0.828595	-0.654941	0.172758	0.195943	0.203166	-0.135226	-0.318637	0.166122	0.178461	0.123154	0.168886	1	0.69091
OOOO_ZrMe_Eth+_INS_TS	3.18425	-0.88587	0.07782	0.17195	0.16385	-0.20734	-0.73759	0.16878	0.17032	0.15142	0.16291	1.00002	2.58273	-0.04859	-0.20088	-0.02799	-0.05358	-0.0037	-0.01319	0.00023	-0.00891	-0.07582	-0.06474	1.00045	2.10003	-0.95491	0.21769	0.27678	0.26903	-0.34333	-0.76404	0.25583	0.25541	0.25683	0.26896	1	1.21263	-0.607261	0.116509	0.202642	0.186004	-0.149892	-0.409467	0.182427	0.162909	0.137501	0.165444	1	0.953773
OOOO_HfMe_Eth+_INS_TS	3.1414	-0.88322	0.07593	0.15957	0.17311	-0.19718	-0.72629	0.16931	0.17118	0.1509	0.16043	1.00033	2.70665	-0.07292	-0.21553	-0.05581	-0.02892	-0.01808	-0.01653	-0.00862	0.00456	-0.0828	-0.06846	1.00071	2.27453	-0.99928	0.21413	0.26617	0.27946	-0.33021	-0.80879	0.25422	0.25677	0.26116	0.26863	1	1.2799	-0.599293	0.115413	0.179419	0.198005	-0.129899	-0.403267	0.153984	0.177622	0.120545	0.15866	1	0.815645
Exxon-Type_Salan_ScMe_Eth_INS_TS	1.22362	-0.60461	0.09924	0.13705	0.13291	-0.17678	-0.50799	0.15365	0.14886	0.13445	0.12879	8e-05	1.98453	0.03722	-0.22845	-0.10179	-0.09676	0.02632	0.07032	-0.04829	-0.04119	-0.12325	-0.12004	0.0004	1.78569	-0.98857	0.18604	0.24145	0.24022	-0.37339	-0.80485	0.24066	0.23585	0.2371	0.23025	0	1.6459	-0.70075	0.038994	0.155796	0.170876	-0.151366	-0.63118	0.12645	0.16171	0.138292	0.168106	0	0.637367
Exxon-Type_Salan_YMe_Eth_INS_TS	2.13338	-0.81214	0.10833	0.12803	0.14622	-0.20216	-0.65358	0.14964	0.14789	0.13609	0.1313	-0.00034	2.26218	-0.01851	-0.18672	-0.15219	-0.08399	0.03806	0.0408	-0.04763	-0.04868	-0.12559	-0.12767	0.00017	1.87004	-1.02597	0.21077	0.23085	0.25416	-0.37527	-0.81554	0.23716	0.23604	0.23934	0.23378	0	1.44337	-0.429739	0.030352	0.040418	0.115713	-0.187689	-0.595659	0.142159	0.155246	0.145246	0.151716	0	0.724834
Exxon-Type_Salan_TiMe_Eth+_INS_TS	1.33135	-0.54022	0.11193	0.16214	0.15822	-0.173	-0.41134	0.17225	0.17229	0.15065	0.1485	1.00012	2.0808	0.00507	-0.19663	-0.03791	-0.04126	0.02254	0.06477	-1e-05	0.0026	-0.06609	-0.06226	1.00019	1.82008	-0.87334	0.20022	0.25397	0.25392	-0.34459	-0.6657	0.25277	0.25327	0.2453	0.24017	1	1.3216	-0.60415	0.112089	0.183786	0.190035	-0.12105	-0.425008	0.150699	0.168612	0.14203	0.164593	1	0.766493
Exxon-Type_Salan_ZrMe_Eth+_INS_TS	3.15901	-0.86162	0.069	0.16497	0.17452	-0.20781	-0.72887	0.16982	0.16882	0.14939	0.14742	0.99988	2.55418	-0.03203	-0.21328	-0.04934	-0.02219	-0.00197	0.01875	-0.01088	0.00015	-0.08483	-0.07759	1.00008	2.08691	-0.92734	0.20219	0.26725	0.2778	-0.34763	-0.76768	0.2551	0.25627	0.25537	0.25044	1	1.42259	-0.665684	0.128489	0.197318	0.219747	-0.165649	-0.414778	0.156474	0.18986	0.129	0.141573	1	0.990905
Exxon-Type_Salan_HfMe_Eth+_INS_TS	3.1153	-0.84996	0.06428	0.16528	0.17358	-0.19853	-0.73044	0.17068	0.16976	0.14883	0.14686	1	2.67684	-0.0498	-0.22784	-0.04815	-0.02647	-0.01723	0.01062	-0.00818	0.00324	-0.08901	-0.07949	1.00042	2.31856	-0.9772	0.19296	0.26821	0.27792	-0.33809	-0.82657	0.25485	0.25588	0.25779	0.25243	1	1.46856	-0.650889	0.117615	0.196875	0.210077	-0.138543	-0.422084	0.14969	0.182746	0.125202	0.137769	1	0.952532
[truncated: 35 more columns]
